# Supplementary material
Source: PubMed Central journal article supplement (PMC4432155)
Supplement: AAC.04367-14_zac006154014so1.pdf [file AAC.04367-14_zac006154014so1.pdf]

**Table EI - Plasmids, strains, primers used in the study.**

| <b>Plasmid</b>                                                                        | <b>Description</b>                                                                                                                                                                                                                                | <b>Reference</b>                                                                                                       |
|---------------------------------------------------------------------------------------|---------------------------------------------------------------------------------------------------------------------------------------------------------------------------------------------------------------------------------------------------|------------------------------------------------------------------------------------------------------------------------|
| pRMC2                                                                                 | Plasmid with $P_{xyl/tetO}$ promoter inducible by anhydrotetracycline. 100 $\mu\text{g/ml}$ Amp <sup>R</sup> in <i>Escherichia coli</i> , 10 $\mu\text{g/ml}$ Cam <sup>R</sup> .                                                                  | [1]                                                                                                                    |
| pRMC2+MsrA                                                                            | pRMC2 plasmid, bearing sequence coding for Msr(A) from <i>Staphylococcus haemolyticus</i> JCSC1435 chromosome (NC_007168.1) with additional C-terminal Gly-(His) <sub>6</sub> tag and inserted into KpnI, SacI restriction sites of pRMC2 vector. | This study                                                                                                             |
| <b>Strains</b>                                                                        | <b>Description</b>                                                                                                                                                                                                                                | <b>Reference</b>                                                                                                       |
| XL1-Blue                                                                              | <i>Escherichia coli</i> cloning strain XL1-Blue                                                                                                                                                                                                   | Stratagene                                                                                                             |
| RN4220 + pRMC2                                                                        | <i>Staphylococcus aureus</i> RN4220 strain transformed by pRMC2. 10 $\mu\text{g/ml}$ Cam <sup>R</sup>                                                                                                                                             | [2]; this study                                                                                                        |
| RN4220+MsrA                                                                           | <i>Staphylococcus aureus</i> RN4220 strain transformed by pRMC2+MsrA. 10 $\mu\text{g/ml}$ Cam <sup>R</sup>                                                                                                                                        | This study                                                                                                             |
| 1,4,7,8,11,14,15,16,17,18,19,20,21,23,24,25,26,27,28,30,37,38,39,40,43,54,58,62,64,70 | RN4220+MsrA mutant strains with increased resistance to telithromycin. 10 $\mu\text{g/ml}$ Cam <sup>R</sup>                                                                                                                                       | This study                                                                                                             |
| 24 <sup>C</sup>                                                                       | Nutant strain 24 cured from plasmid                                                                                                                                                                                                               | This study                                                                                                             |
| 24 <sup>C</sup> +pRMC2                                                                | Mutant strain 24 <sup>C</sup> bearing pRMC2                                                                                                                                                                                                       | This study                                                                                                             |
| 24 <sup>R</sup>                                                                       | Mutant strain 24 <sup>C</sup> transformed with pRMC2+MsrA                                                                                                                                                                                         | This study                                                                                                             |
| 8325-4+pRMC2                                                                          | <i>Staphylococcus aureus</i> 8325-4 strain transduced with pRMC2                                                                                                                                                                                  | [3]; This study                                                                                                        |
| 8325-4+MsrA                                                                           | <i>Staphylococcus aureus</i> 8325-4 strain transduced with pRMC2+MsrA                                                                                                                                                                             | [3]; This study                                                                                                        |
| $\Delta\text{clpX}$ +pRMC2                                                            | <i>Staphylococcus aureus</i> 8325-4 strain $\Delta\text{clpX}$ transduced with pRMC2                                                                                                                                                              | [3]; This study                                                                                                        |
| $\Delta\text{clpX}$ +MsrA                                                             | <i>Staphylococcus aureus</i> 8325-4 strain $\Delta\text{clpX}$ transduced with pRMC2+MsrA                                                                                                                                                         | [3]; This study                                                                                                        |
| $\Delta\text{clpC}$ +pRMC2                                                            | <i>Staphylococcus aureus</i> 8325-4 strain $\Delta\text{clpC}$ transduced with pRMC2                                                                                                                                                              | [4]; This study                                                                                                        |
| $\Delta\text{clpC}$ +MsrA                                                             | <i>Staphylococcus aureus</i> 8325-4 strain $\Delta\text{clpC}$ transduced with pRMC2+MsrA                                                                                                                                                         | [4]; This study                                                                                                        |
| $\Delta\text{clpP}$ +pRMC2                                                            | <i>Staphylococcus aureus</i> 8325-4 strain $\Delta\text{clpP}$ transduced with pRMC2                                                                                                                                                              | [3]; This study                                                                                                        |
| $\Delta\text{clpP}$ +MsrA                                                             | <i>Staphylococcus aureus</i> 8325-4 strain $\Delta\text{clpP}$ transduced with pRMC2+MsrA                                                                                                                                                         | [3]; This study                                                                                                        |
| <b>Primers</b>                                                                        | <b>Sequence</b>                                                                                                                                                                                                                                   | <b>Description</b>                                                                                                     |
| MrsA_forward                                                                          | TAAGCTCTCTATGATGGTACCTAAGGAGGCAAA<br>TATGGAACAATATACAATTAATTTAACCAAAT<br>CAATCATAAATTG                                                                                                                                                            | <i>msr(A)</i> amplification, addition of Shine-Dalgarno sequence and KpnI restriction site                             |
| MrsA_reverse                                                                          | ACGGCCAGTGAATTCGAGCTCTTAATGATGATG<br>ATGATGATGTGAACCACCTGGAGTTATATC<br>ATGAATAGATTGCTCTGTTAATTCCC                                                                                                                                                 | <i>msr(A)</i> amplification, with addition of sequence coding for Gly-(His) <sub>6</sub> tag and SacI restriction site |
| MsrA_MUT_F                                                                            | TTATTTGGATCCCCCTCGAGTT                                                                                                                                                                                                                            | <i>msr(A)</i> sequencing                                                                                               |
| MsrA_MUT_R                                                                            | TGTGCTGCAAGGCGATTA                                                                                                                                                                                                                                | <i>msr(A)</i> sequencing                                                                                               |
| ClpX_Forward                                                                          | TTTTGGTACCTGTTGCATTGTAACATCCAATCTA<br>GTATAGTC                                                                                                                                                                                                    | <i>clpX</i> amplification                                                                                              |
| ClpX_Reverse                                                                          | TTTTGGATCCTAATGATTAATTCTATATTATTAG<br>GATTAACCTTTTCATTTTATATCCTC                                                                                                                                                                                  | <i>clpX</i> amplification                                                                                              |
| ClpX_Seq_1                                                                            | GGCACACGTCCGATAAATTC                                                                                                                                                                                                                              | <i>clpX</i> sequencing                                                                                                 |
| ClpX_Seq_2                                                                            | TGACGTTTCAGGTGAAGGTG                                                                                                                                                                                                                              | <i>clpX</i> sequencing                                                                                                 |

## References

1. Corrigan RM, Foster TJ (2009) An improved tetracycline-inducible expression vector for *Staphylococcus aureus*. *Plasmid* **61**: 126–129.
2. Nair D, Memmi G, Hernandez D, Bard J, Beaume M, Gill S, Francois P, Cheung AL (2011) Whole-genome sequencing of *Staphylococcus aureus* strain RN4220, a key laboratory strain used in virulence research, identifies mutations that affect not only virulence factors but also the fitness of the strain. *J Bacteriol* **193**: 2332–2335.
3. Frees D, Qazi SN a., Hill PJ, Ingmer H (2003) Alternative roles of ClpX and ClpP in *Staphylococcus aureus* stress tolerance and virulence. *Mol Microbiol* **48**: 1565–1578.
4. Frees D, Chastanet A, Qazi S, Sørensen K, Hill P, Msadek T, Ingmer H (2004) Clp ATPases are required for stress tolerance, intracellular replication and biofilm formation in *Staphylococcus aureus*. *Mol Microbiol* **54**: 1445–1462.
